# Supplementary material for: Inter-assay precision of clonogenic assays for radiosensitivity in cancer cell line A549
Source: PubMed Central journal article supplement (PMC5862609; doi:10.18632/oncotarget.24448), 2018-02-07
Supplement: oncotarget-09-13706-s001.pdf [file oncotarget-09-13706-s001.pdf]

# Inter-assay precision of clonogenic assays for radiosensitivity in cancer cell line A549

## SUPPLEMENTARY MATERIALS

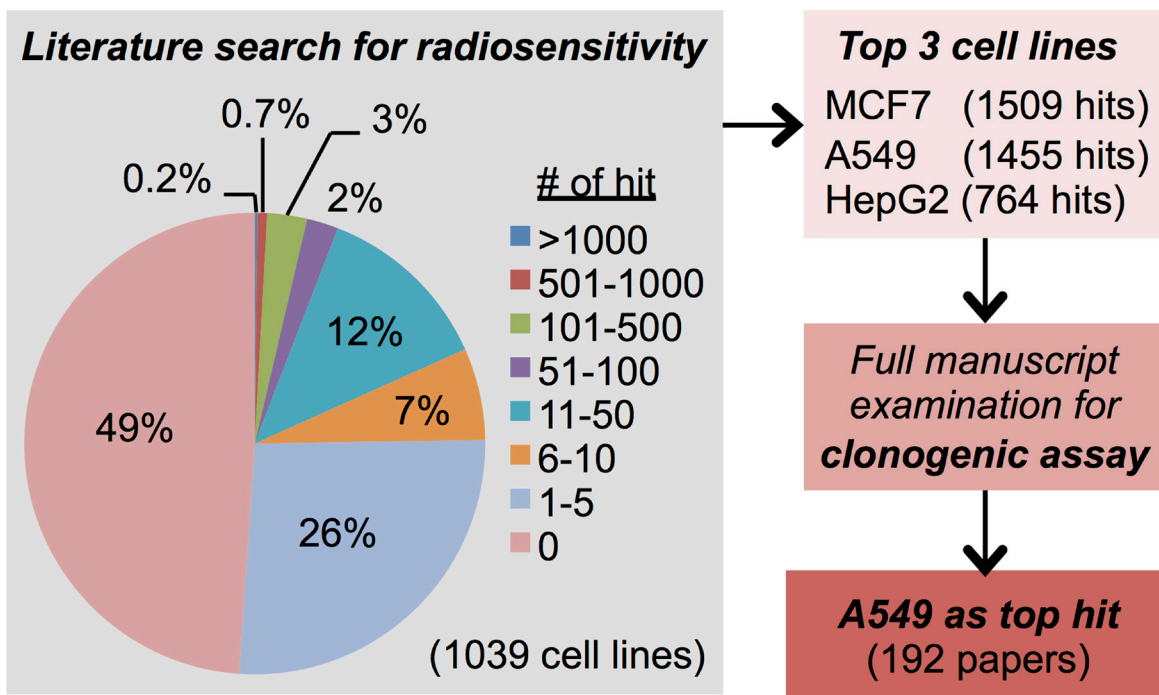

Supplementary Figure 1: Scheme for literature search.

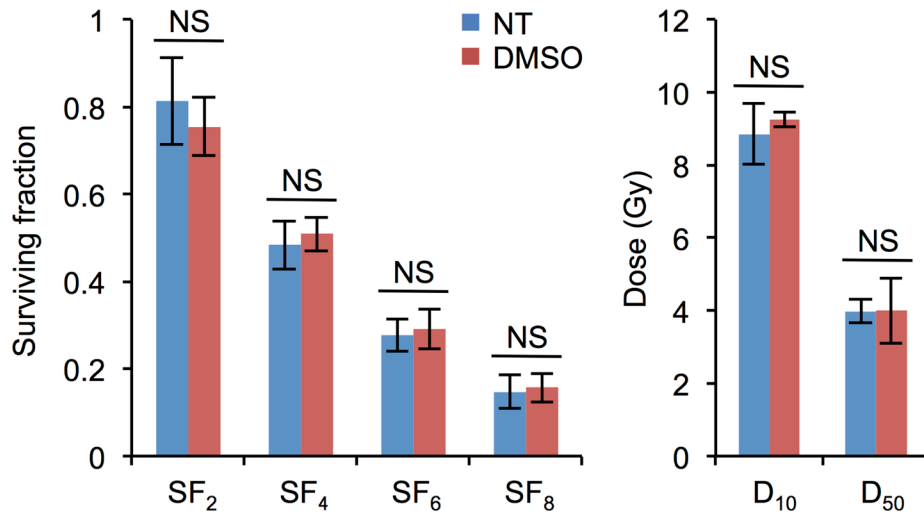

**Supplementary Figure 2: Effect of DMSO on clonogenic survival of irradiated A549 cells.** A549 cells treated with DMSO (Sigma) were irradiated with X-rays and subjected to clonogenic assay as described in MATERIALS AND METHODS ( $n = 12$ ). The cells were exposed to 0.1% DMSO from 2 hours before irradiation until the time of colony staining. DMSO concentration was determined based on the maximal concentration described in publications collected from a literature search, in which DMSO concentration ranged from 0.001 to 0.1% (PMID: 9766667; 16928817; 16957930; 17875720; 22441439; 24366006; 24606853; 25692226). The differences in the clonogenic endpoints (i.e., SF<sub>2</sub>, SF<sub>4</sub>, SF<sub>6</sub>, SF<sub>8</sub>, D<sub>10</sub>, and D<sub>50</sub>) between non-treated (NT) and DMSO-treated cells were examined by non-paired two-tailed Student's *t*-test. Differences were considered statistically significant at  $P$  values  $< 0.05$ . NS, no statistically significant difference.

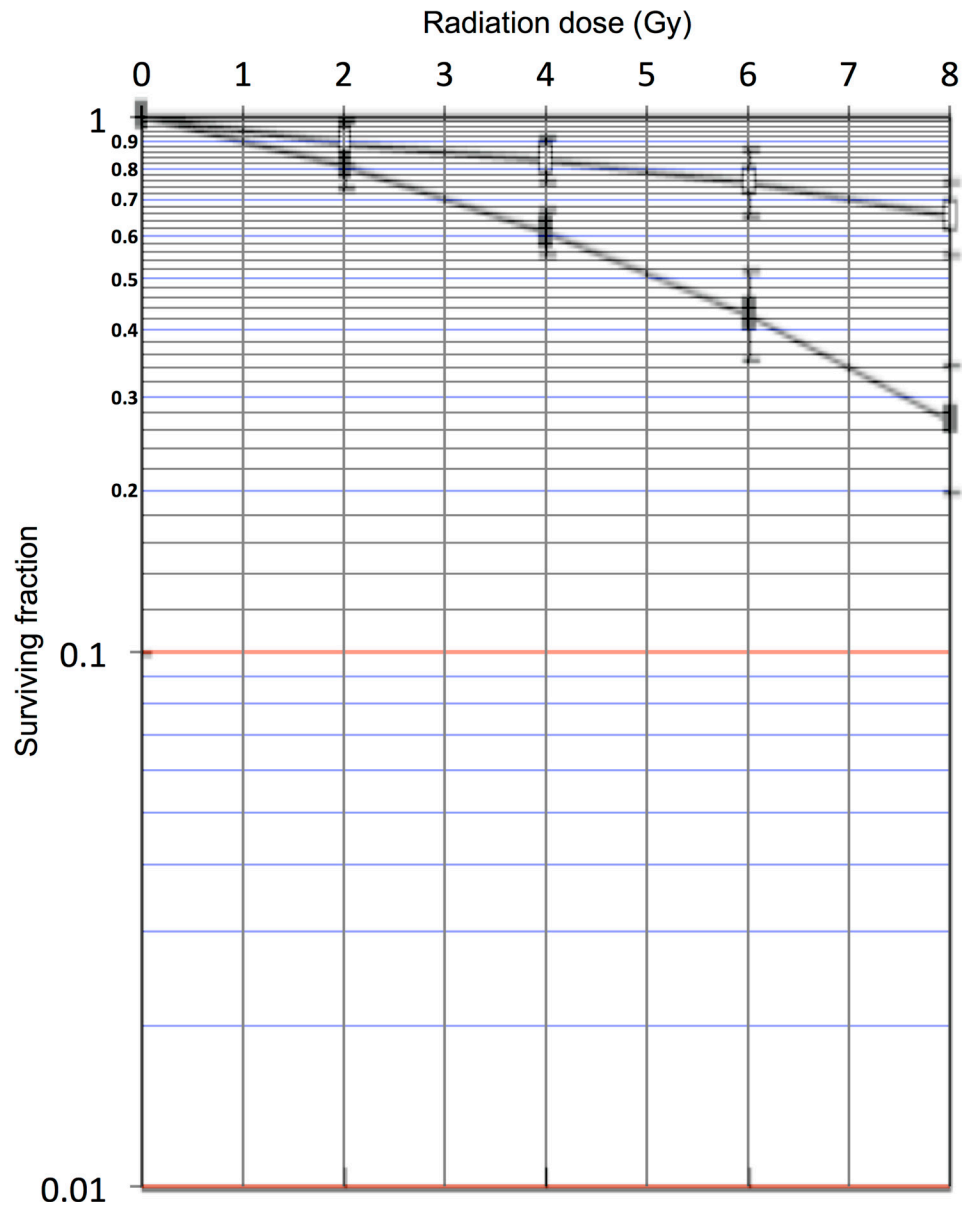

**Supplementary Figure 3: Example of acquisition of clonogenic survival data from a published figure.** A figure describing clonogenic survival is overlaid on grid scales in a semi-transparent display that enables measurement of the surviving fraction.

**Supplementary Table 1: Clonogenic assay data for IR-treated A549 cells collected from the literatures.**  
See Supplementary\_Table\_1

**Supplementary Table 2: Clonogenic survival data for IR-treated A549 cells collected from *in vitro* experiments**

| <b>Experiment</b> | <b>SF2</b> | <b>SF4</b> | <b>SF6</b> | <b>SF8</b> | <b>D10</b> | <b>D50</b> |
|-------------------|------------|------------|------------|------------|------------|------------|
| 1                 | 0.80       | 0.53       | 0.28       | 0.10       | 8.1        | 4.2        |
| 2                 | 0.74       | 0.22       | 0.10       | 0.05       | 6.3        | 2.2        |
| 3                 | 0.65       | 0.38       | 0.20       | 0.10       | 7.9        | 3.0        |
| 4                 | 0.70       | 0.54       | 0.33       | 0.18       | 9.9        | 4.1        |
| 5                 | 0.64       | 0.37       | 0.22       | 0.10       | 8.1        | 3.0        |
| 6                 | 0.72       | 0.22       | 0.06       | 0.02       | 5.5        | 2.3        |
| 7                 | 0.87       | 0.29       | 0.11       | 0.05       | 6.5        | 2.8        |
| 8                 | 0.76       | 0.54       | 0.33       | 0.18       | 9.6        | 4.3        |
| 9                 | 0.72       | 0.47       | 0.24       | 0.08       | 7.7        | 3.8        |
| 10                | 0.60       | 0.28       | 0.14       | 0.02       | 6.1        | 2.8        |
| 11                | 0.63       | 0.26       | 0.05       | 0.01       | 5.3        | 2.6        |
| 12                | 0.87       | 0.28       | 0.10       | 0.05       | 6.5        | 2.6        |
| 13                | 0.49       | 0.32       | 0.14       | 0.05       | 6.6        | 2.5        |
| 14                | 0.75       | 0.44       | 0.16       | 0.05       | 7.0        | 3.5        |
| 15                | 0.87       | 0.55       | 0.31       | 0.11       | 8.2        | 4.5        |
| 16                | 0.69       | 0.50       | 0.24       | 0.12       | 8.3        | 3.7        |
| 17                | 0.65       | 0.38       | 0.18       | 0.10       | 7.9        | 2.9        |
| 18                | 0.90       | 0.29       | 0.10       | 0.04       | 6.4        | 2.8        |
| 19                | 0.47       | 0.28       | 0.12       | 0.04       | 6.2        | 2.3        |
| 20                | 0.58       | 0.24       | 0.13       | 0.00       | 6.7        | 2.1        |

**Supplementary Table 3: Cell line name for literature search.** See Supplementary\_Table\_3
